# Supplementary material
Source: PubMed Central journal article supplement (PMC5470502)
Supplement: PEDS_20163353SupplementaryData.pdf [file PEDS_20163353SupplementaryData.pdf]

## Supplemental Information

### SUSCEPTIBILITY

Susceptibility was individually assessed for 8 tobacco products: cigarettes, e-cigarettes, pipes, cigars, hookahs, smokeless tobacco, dissolvable tobacco, and bidis/kreteks. A summary score covering all tobacco products was constructed from the scores for individual products.

I. Have you ever seen or heard of (product) before this study? (Asked of all products except for cigarettes)

- Only those answering “yes” are asked further questions about the product; all other responses were given a score of “never heard of” for the product in question.

- Susceptibility was assessed among those who did not say they had ever tried the product (response categories of “no,” “don’t know,” and “refused”).

II. Susceptibility question 1: Have you ever been curious about [using product]?

1. Very curious
2. Somewhat curious
3. A little curious
4. Not at all curious

III. Susceptibility question 2 (asked only of cigarettes): Do you think you will smoke a cigarette in the next year?

1. Definitely yes
2. Probably yes
3. Probably not
4. Definitely not

IV. Susceptibility question 3 (asked of products that are not cigarettes): Do you think you will try a [product] soon?

1. Definitely yes

2. Probably yes

3. Probably not

4. Definitely not

- This was asked of all never users of products other than cigarettes. For cigarettes, it was asked only of those who answered definitely or probably yes to smoking in the next year. This item was not included for cigarettes because it was redundant with smoking in the next year.

V. Susceptibility question 4: If one of your best friends were to offer you [product], would you [use it]?

1. Definitely yes
2. Probably yes
3. Probably not
4. Definitely not

### Coding

Those who gave a response of “4” to all 3 questions (curious, next year/soon, best friend) are considered committed never users. Those with nonresponse answers (–7, refused; –8, don’t know) were therefore considered susceptible. An overall tobacco use score was assigned on the basis of the maximum value for all products of which the respondent had heard (at a minimum, cigarettes). Only those individuals who were scored as committed never users to all such products were considered committed never users to all products; all others who had never used any product were scored as susceptible never users.

### USE OF OTHER SUBSTANCES

The following questions were asked of all respondents to assess substance use:

I. “Have you ever used alcohol at all, including sips of someone’s drink or your own drink?” (R01\_YX0084)

II. “Have you ever smoked part or all of a cigar, cigarillo, or filtered cigar with marijuana in it?” (R01\_YG9105)

III. “Have you ever used marijuana, hash, THC, grass, pot, or weed?” (R01\_YX0085)

IV. “Have you ever used any of the following prescription drugs that were not prescribed for you or that you took only for the experience or feeling they caused?”

a. Ritalin or Adderall (R01\_YX0089\_01)

b. Painkillers, sedatives, or tranquilizers (R01\_YX 0089\_02)

V. “Have you ever used any of the following substances?”

a. Cocaine or crack (R01\_YX0220\_01)

b. Stimulants like methamphetamine or speed (R01\_YX0220\_02)

c. Any other drugs like heroin, inhalants, solvents, or hallucinogens (R01\_YX0220\_03)

### Coding

Possible responses were “yes,” “no,” “don’t know,” and “refused.” If the respondent answered “yes” to  $\geq 1$  of these questions they were scored as having “any use” of substances; if the respondent did not answer “yes” to any question, they were scored as having “no use” of substances.

## MODIFICATION OF GLOBAL APPRAISAL OF INDIVIDUAL NEEDS—SHORT SCREENER SUBSCALES FOR THE PATH STUDY

The Global Appraisal of Individual Needs (GAIN) internalizing disorder screener score was computed by using 4 out of 5 items originally included in the GAIN Short Screener (GAIN SS) that assess symptoms of internalizing disorders (YX0161, YX0162, YX0163, YX0164). The GAIN SS item that assesses symptoms of suicidality was not included in the PATH wave 1 youth questionnaire.

The GAIN substance use disorder screener score was computed by using the response to 7 questionnaire items based on the 5 items in the GAIN SS used to screen for substance use disorders. Three of the items (YX0170, YX0172, YX0173) come directly from 5-item GAIN SS. The 2 remaining GAIN SS items used to screen for substance use disorders were each split into 2 separate questionnaire items (YX0171 and YX0193; YX0174 and YX0194).

## PSYCHOSOCIAL RISK FACTORS

### GAIN Scales

I. Internalizing disorder: “When was the last time that you had significant problems with....”

- a. Feeling very trapped, lonely, sad, blue, depressed, or hopeless about the future? (R01\_YX0161)
- b. Sleep trouble, such as bad dreams, sleeping restlessly, or falling asleep during the day? (R01\_YX0162)

c. Feeling very anxious, nervous, tense, scared, panicked, or like something bad was going to happen? (R01\_YX0163)

d. Becoming very distressed and upset when something reminded you of the past? (R01\_YX0164)

II. Externalizing disorder: “When was the last time that you did the following things two or more times...”

a. Lied or conned to get things you wanted or to avoid having to do something? (R01\_YX0165)

b. Had a hard time paying attention at school, work, or home? (R01\_YX0166)

c. Had a hard time listening to instructions at school, work, or home? (R01\_YX0167)

d. Were a bully or threatened other people? (R01\_YX0168)

e. Started physical fights with people? (R01\_YX0169)

III. Substance use disorder: “When was the last time that....”

a. You used alcohol or other drugs weekly or more often? (R01\_YX0170)

b. You spent a lot of time getting alcohol or other drugs? (R01\_YX0171)

c. You spent a lot of time using or recovering from alcohol or other drugs? (R01\_YX0193)

d. You kept using alcohol or other drugs even though it was causing social problems, leading to fights, or getting you into trouble with other people? (R01\_YX0172)

e. Your use of alcohol or other drugs reduced your involvement with

activities at work, school, home, or social events? (R01\_YX0173)

f. You had withdrawal problems such as shaky hands, throwing up, having trouble sitting still or sleeping? (R01\_YX0174)

g. You used any alcohol or other drugs to stop being sick or avoid withdrawal problems? (R01\_YX0194)

### Coding

Response categories for the above items were as follows: past month, 2 to 12 months ago, >1 year ago, never, refused, and don't know. Those who reported these feelings or behaviors in the past month or 2 to 12 months ago were scored as having past-year experience. Scores were summed over the items in the subscale.

### Sensation Seeking Scale

a. I like to do frightening things (R01\_YX0510).

b. I like new and exciting experiences, even if I have to break the rules (R01\_YX0515).

c. I prefer friends who are exciting and unpredictable (R01\_YX0520).

### Coding

Response categories for these items were as follows: strongly agree, agree, neither agree nor disagree, disagree, strongly disagree, and don't know and refused. Those who reported agreeing or strongly agreeing with the statement were scored 1 for the item; scores were summed over the 3 items.
